# Supplementary material for: Pore size and surface charge control in mesoporous TiO2 using post-grafted SAMs
Source: Royal Society of Chemistry journal article supplement (doi:10.1039/b921743f), 2010-01-01
Supplement: b921743f.pdf [file b921743f.pdf]

## Supporting information:

### **Pore size and surface charge control in mesoporous TiO<sub>2</sub> using post-grafted SAMs.**

*Dereje Hailu Taffa,<sup>†</sup> Murugavel Kathiresan,<sup>†</sup> Lorenz Walder,<sup>†\*</sup> Britta Seelandt<sup>‡</sup> and Michael Wark<sup>‡</sup>*

*<sup>†</sup> Institute of Chemistry, University of Osnabrück, Barbarastrasse. 7, D-49069 Osnabrück, Germany, and*

*<sup>‡</sup> Institute of Physical Chemistry and Electrochemistry, Leibnz Universität Hannover, Callinstrasse 3A , D-30167 Hannover, Germany*

Corresponding author: Prof. Dr. Lorenz Walder, Institute of Chemistry, University of Osnabrück, 49069 Osnabrück, mail: [LoWalder@uos.de](mailto:LoWalder@uos.de)

## 1. IR Measurements

Representative IR spectra of the modified films are shown in the figure below and the frequency assignments of the absorption bands are tabulated in table 1.

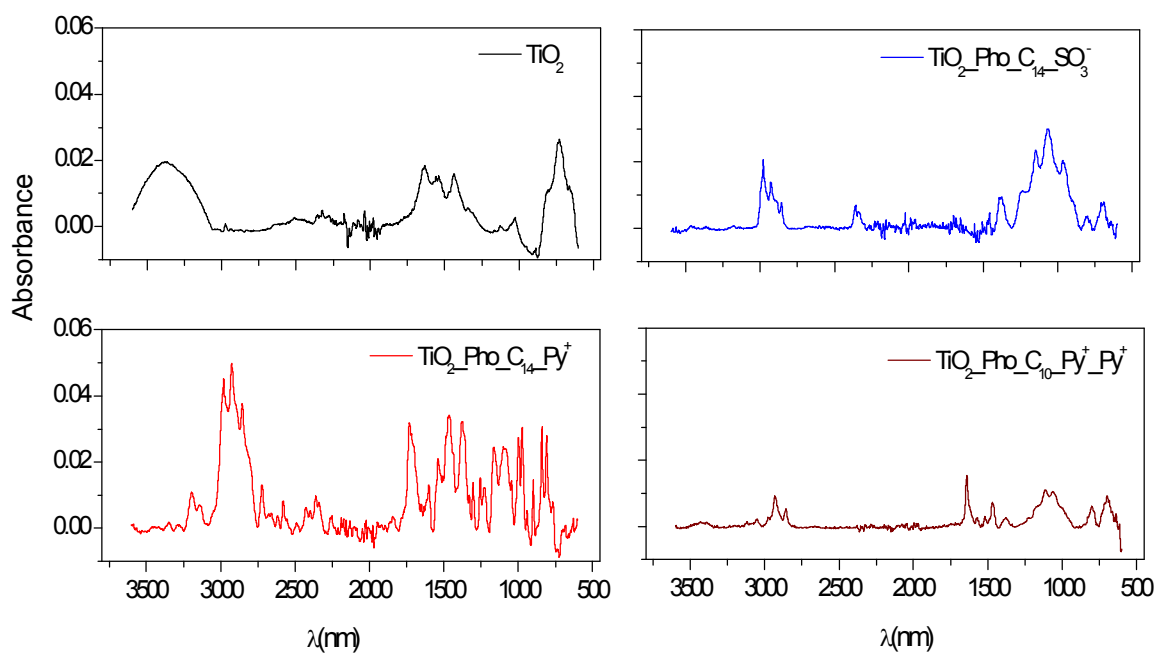

**Figure 1:** Selected IR spectra of unmodified and modified mesoporous TiO<sub>2</sub> films.

**Table 1: Frequency assignments for the IR Absorption bands**

| film                                                  | Frequency        | Assignment                                             | ref  |
|-------------------------------------------------------|------------------|--------------------------------------------------------|------|
| TiO <sub>2</sub>                                      | 3000- 3600       | O-H stretching (H <sub>2</sub> O)                      | 1    |
|                                                       | 1640, 1540, 1440 | O-H bending,                                           |      |
|                                                       | 730              | lattice vibration                                      |      |
| TiO <sub>2</sub> _PhO_C <sub>14</sub> _R <sup>+</sup> | 3080-3200        | C-H stretching (aromatic system)                       | 2    |
|                                                       | 2926             | C-H asymmetric stretching (aliphatic CH <sub>2</sub> ) | 3    |
|                                                       | 2854             | C-H symmetric stretching (aliphatic CH <sub>2</sub> )  | 2    |
|                                                       | 1600-1700        | C=C, C=N stretching (ring)                             | 4    |
|                                                       | 1000-1150        | O-P stretching                                         |      |
| TiO <sub>2</sub> _PhO_C <sub>14</sub> _R <sup>-</sup> | 2928             | CH <sub>2</sub> asymmetric stretching                  | 2, 4 |
|                                                       | 2856             | CH <sub>2</sub> symmetric stretching                   |      |
|                                                       | 1375             | S=O asymmetric stretching                              |      |
|                                                       | 1000-1150        | O-P-O stretching                                       |      |

**Table 1:** Surface coverage of the different phosphonic acid (from IR Spectroscopy) on mesoporous s-TiO<sub>2</sub> thin films.

| Charge   | Phosphonic acids                                  | $\Gamma_{\text{IR}}$<br>(mol/cm <sup>2</sup> ) x 10 <sup>-7</sup> |
|----------|---------------------------------------------------|-------------------------------------------------------------------|
| Positive | Pho-C <sub>6</sub> -Py <sup>+</sup>               | 0.7                                                               |
|          | Pho-C <sub>10</sub> -Py <sup>+</sup>              | 1.1                                                               |
|          | Pho-C <sub>14</sub> -Py <sup>+</sup>              | 1.1                                                               |
| Negative | Pho-C <sub>6</sub> -SO <sub>3</sub> <sup>-</sup>  | 0.3                                                               |
|          | Pho-C <sub>10</sub> -SO <sub>3</sub> <sup>-</sup> | 0.7                                                               |
|          | Pho-C <sub>14</sub> -SO <sub>3</sub> <sup>-</sup> | 0.8                                                               |

Note: surface concentrations are not corrected for roughness factor ( $\approx 400$ ).

## Electrochemical Measurements

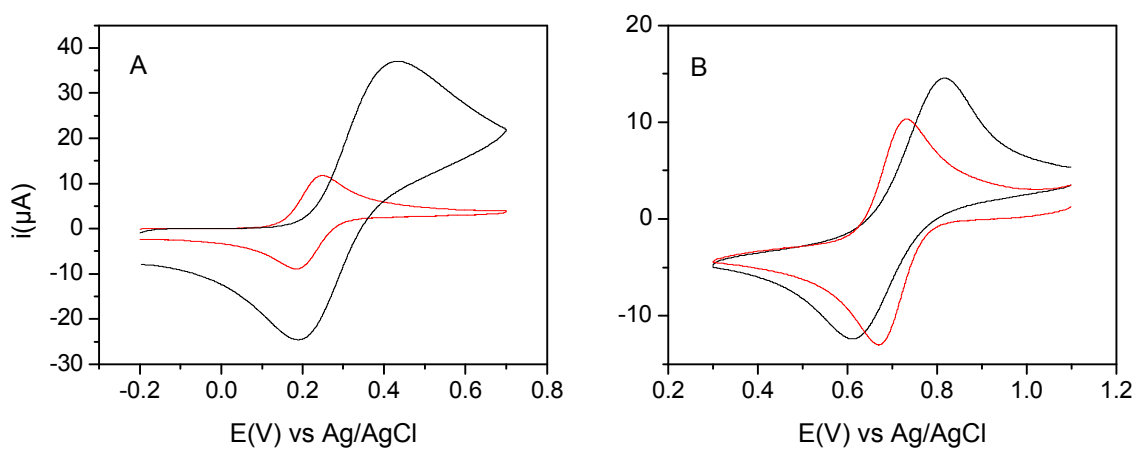

**Figure 2:** Cyclic voltatmmetry, (A) 0.1mM  $[\text{Fe}(\text{CN})_6]^{4-}$  and (B) 0.1mM  $[\text{IrCl}_6]^{2-}$  on bare  $\text{TiO}_2$ (black) and FTO(red).

Influence of the carbon chain length on the pore size: a case of the negatively charged phosphonic acid with negatively charged redox ions.

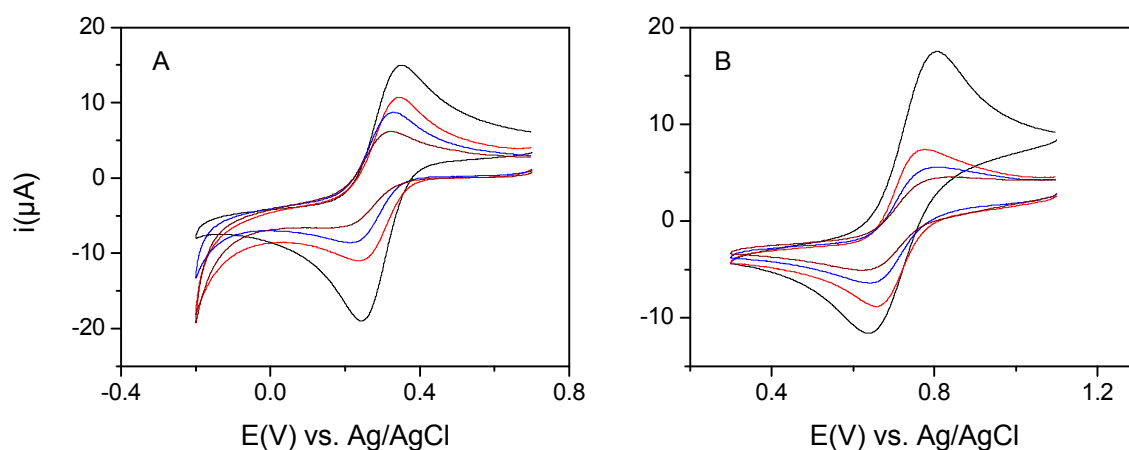

**Figure 3:** Cyclic voltatmmetry, (A) 0.1mM  $[\text{Fe}(\text{CN})_6]^{3-}$  and (B) 0.1mM  $[\text{IrCl}_6]^{2-}$  on s- $\text{TiO}_2$ \_Pho\_C<sub>n</sub>\_SO<sub>3</sub><sup>-</sup> electrode with different carbon chain: bare s- $\text{TiO}_2$  (black), n=6(red), n=10 (blue) and n=14 (wine).

**Table 2:** Increase of peak to peak separation ( $\Delta E_p$ ) on  $\text{TiO}_2\text{-Pho-C}_n\text{-SO}_3^-$  electrode for negatively charged redox ions.

| Electrode                                      | $[\text{IrCl}_6]^{2-/3-}$ |                         | $[\text{Fe}(\text{CN})_6]^{3-/4-}$ |                         |
|------------------------------------------------|---------------------------|-------------------------|------------------------------------|-------------------------|
|                                                | $I_{a,p}(\mu\text{A})$    | $\Delta E_p(\text{mV})$ | $I_{a,p}(\mu\text{A})$             | $\Delta E_p(\text{mV})$ |
| $\text{TiO}_2\text{-Pho-C}_6\text{-SO}_3^-$    | 7                         | 101                     | 11                                 | 85                      |
| $\text{TiO}_2\text{-Pho-C}_{10}\text{-SO}_3^-$ | 5                         | 127                     | 8                                  | 91                      |
| $\text{TiO}_2\text{-Pho-C}_{14}\text{-SO}_3^-$ | 3                         | 153                     | 7                                  | 102                     |

## Synthesis

The dialkylation of 1,3-trimethylene dipyridine is well known in literature,<sup>5, 6</sup> but its monoalkylation with methyl iodide or other alkylating agents has not been reported so far. After several unsuccessful trials we found a way using one equivalent of 1,3-trimethylene dipyridine and a sub-stoichiometric amount (1/5 equivalent) of methyl iodide in acetonitrile as a solvent. The synthesis follows scheme:

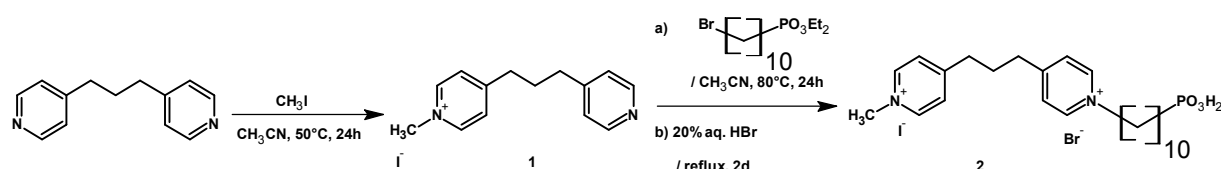

**Scheme**

**1-methyl-4-[3-(pyridin-4-yl)propyl]pyridinium iodide:** To a solution of 2g (10.08mmol) 1,3-trimethylenedipyridine in 20ml MeCN at 50°C a solution of 0.13ml (2.017mmol) methyl iodide in 20ml acetonitrile was added dropwise over 4h and stirred for another 20h. MeCN was then distilled off under reduced pressure, to yield a slurry, which was dissolved in water and washed with dichloromethane. Removal of

the water under reduced pressure gave solid which was then dried under high vacuum to afford 0.600g (1.76mmol, 87%) 1-methyl-4-[3-(pyridin-4-yl)propyl]pyridinium iodide as a dark brown solid.

<sup>1</sup>H NMR (250 MHz, D<sub>2</sub>O, δ): 8.46 (d, *J* = 6.52 Hz, 2H), 8.33 (d, *J* = 6.16 Hz, 2H), 7.72 (d, *J* = 6.42 Hz, 2H), 7.37 (d, *J* = 6.09 Hz, 2H), 4.18 (s, 3H), 2.84 (t, 2H), 2.71 (t, 2H), 2.09-1.93 (m, 2H).

**1-methyl-4-{3-[1-(10-phosphonodecyl) pyridinium-4-yl]propyl} pyridinium bromide iodide:** 0.4g (1.17mmol) of 1-methyl-4-[3-(pyridin-4-yl)propyl]pyridinium iodide and 0.84g (2.35mmol) diethyl(10-bromodecyl)phosphonate were reacted in 20ml MeCN at 80°C for 24h. After 24h, MeCN was distilled off under reduced pressure, the residue dissolved in water, and washed with ethylacetate. Removal of water under reduced pressure yielded a dark reddish brown solid which was hydrolysed using 20ml 20% aqueous HBr at 100°C for 2 days, followed by removal of the solvent under reduced pressure to yield a black oily residue. It was dissolved in 20ml MeOH, loaded with 0.5g charcoal, heated and filtered through Celite. The filtrate thus obtained was evaporated under reduced pressure yielding a pale brown semisolid of 0.55g (.85 mmol, 73%).

<sup>1</sup>H NMR (250 MHz, D<sub>2</sub>O, δ): 8.56 (dd, *J* = 6.34 Hz, 4H), 7.81 (t, *J* = 5.65 Hz, 4H), 4.44 (t, 2H), 4.22 (s, 3H), 2.92 (t, 4H), 2.08 (t, 2H), 1.96-1.81 (m, 2H), 1.75-1.56 (m, 2H), 1.53-1.33 (m, 2H), 1.17 (d, 12H).

## References

- 1 P. A. Connor, K. D. Dobson and A. J. McQuillan, *Langmuir*, 1999, **15**, 2402-2408.
- 2 R. M. Silverstein, F. X. Webster and D. Kiemie, *Spectrometric Identification of Organic Compounds, 7th Edition*, John Wiley and Sons, Danvers, MA, USA. 2002; Chapter 2
- 3 D. Taffa, M. Kathiresan and L. Walder, *Langmuir*, 2009, **25**, 5371-5379.
- 4 P. A. Connor and A. J. McQuillan, *Langmuir*, 1999, **15**, 2916-2921.
- 5 A. R. Katritzky, W. Q. Fan and Q. L. Li, *J. Heterocycl. Chem.*, 1988, **25**, 1311-1314.
- 6 X. Jiao, Y. Niu, H. Zhang, L. Zhu and F. Zhao, *J. Chem. Crystallogr.*, 2006, **36**, 685-689.
